# Supplementary material for: Risk factors for adverse events occurring after recovery from stereotactic brain biopsy in dogs with primary intracranial neoplasia
Source: PubMed Central journal article supplement (PMC7517515; doi:10.1111/jvim.15885), 2020-09-14
Supplement: JVIM-34-2021-s001.pdf [file JVIM-34-2021-s001.pdf]

## Small Animal Karnofsky Performance Score (KPS)

| KPS Score | Description                                                                                                                                                                                                                                                                                            |
|-----------|--------------------------------------------------------------------------------------------------------------------------------------------------------------------------------------------------------------------------------------------------------------------------------------------------------|
| 100       | Normal, no complaints, no evidence of disease. Normal ADL; no clinically apparent alterations present (includes asymptomatic tumor).                                                                                                                                                                   |
| 90        | Able to execute normal activity. Normal ADL, clinical signs of disease or physical examination abnormalities subclinical/minor and localized in one organ system. Includes structural epilepsy with normal interictal neurological examination, or subclinical neurological examination abnormalities. |
| 80        | Normal activity with effort, some signs of disease obvious. Includes neurological abnormalities that are visible to or reported by owner.                                                                                                                                                              |
| 70        | Cares for self but unable to perform ADL. At least one organ with major signs of disease. Mildly lethargic over baseline (lethargy grade 1), normal appetite. Includes Frankel Grade 4 SCI.                                                                                                            |
| 60        | Requires occasional assistance to care for self. At least one organ with major signs of disease. Moderately lethargic over baseline (lethargy grade 2), mildly decreased appetite and/or water intake. <5% BW loss. Includes Frankel Grade 3 SCI.                                                      |
| 50        | Requires considerable assistance and constant medical care. Lethargy grade 2, moderately decreased appetite, normal water intake. Loss of 5-10% BW. Recumbent, assisted feeding, or Frankel Grades 2, 1, or 0 SCI present.                                                                             |
| 40        | Severely restricted in ADL. Severely decreased appetite. Spontaneous water intake slightly reduced, but without clinical signs of dehydration. Loss of 5-10% BW. Hospitalization recommended, or MGCS <14.                                                                                             |
| 30        | Severely disabled, hospitalization indicated but death not imminent. Lethargy grade 3, anorexia or severely diminished water intake with clinical evidence of dehydration. Loss of <10% BW or MGCS 10-14.                                                                                              |
| 20        | Very sick, hospitalization with active treatment necessary. Severely disabled, all ADL absent, lethargy grade 4, clinically dehydrated, assisted feeding required, or ≥ 3 organs systems with major signs of disease. Loss of > 10% BW or MGCS <10.                                                    |
| 10        | Moribund/comatose; fatal process progressing rapidly. Patient may require advanced life support measures.                                                                                                                                                                                              |
| 0         | Dead                                                                                                                                                                                                                                                                                                   |

ADL= activities of daily living

BW= body weight

MGCS= modified Glasgow coma score

SCI= spinal cord injury
